# Supplementary material for: IL-33 Drives Monocyte Recruitment to Lung Interstitium through Chemokine Upregulation
Source: PubMed Central journal article supplement — Immunohorizons. Author manuscript; Available in PMC 2018 Apr 6. (PMC5889047; doi:10.4049/immunohorizons.1700024), 2017-08-15
Supplement: NIHMS953759-supplement-Supplemental_Figure_1.pdf [file NIHMS953759-supplement-Supplemental_Figure_1.pdf]

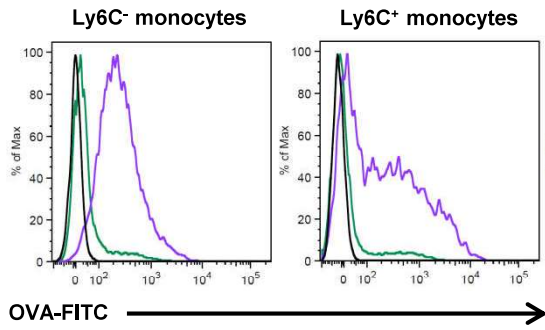

**Supplemental Figure 1:** Antigen uptake in monocytes is enhanced by OVA-IC. WT mice received  $\alpha$ -OVA<sup>depl</sup> serum (OVA) or  $\alpha$ -OVA serum (OVA-IC) i.v. followed by a fluorescently labeled OVA (OVA-FITC) challenge i.t. 24 hours later. 18 hours after challenge, the mice were sacrificed and FITC expression on monocytes was assessed by flow cytometry. (Black – unchallenged, Green – OVA, Purple – OVA-IC.) The data are representative plots with at least six mice analyzed per group.
