# Supplementary material for: IL-33 Drives Monocyte Recruitment to Lung Interstitium through Chemokine Upregulation
Source: PubMed Central journal article supplement — Immunohorizons. Author manuscript; Available in PMC 2018 Apr 6. (PMC5889047; doi:10.4049/immunohorizons.1700024), 2017-08-15
Supplement: NIHMS953759-supplement-Supplemental_Figure_2.pdf [file NIHMS953759-supplement-Supplemental_Figure_2.pdf]

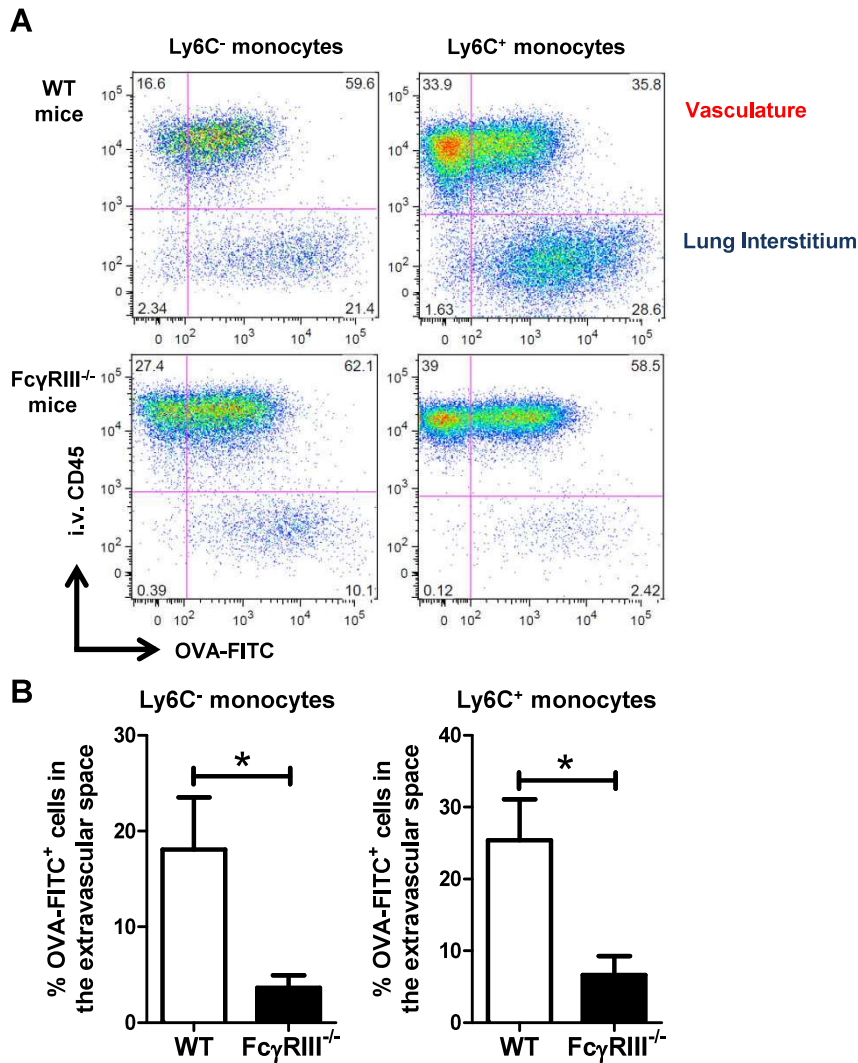

**Supplemental Figure 2:** Monocyte migration from the vasculature to the interstitium is dependent on FcγRIII. WT and FcγRIII<sup>-/-</sup> mice received α-OVA (OVA-IC) i.v. followed by a fluorescently labeled OVA (OVA-FITC) challenge 24 hours later. 18 hours after challenge, the mice were sacrificed. (A) Representative flow plots of antigen uptake (OVA-FITC) versus localization (i.v. CD45) for Ly6C<sup>-</sup> and Ly6C<sup>+</sup> monocytes. (B) Percentage of OVA-FITC<sup>+</sup> cells in the extravascular space is plotted. Data represent the mean ± SEM. The data are from two independent experiments with at least six mice analyzed per group.
