# Supplementary material for: IL-33 Drives Monocyte Recruitment to Lung Interstitium through Chemokine Upregulation
Source: PubMed Central journal article supplement — Immunohorizons. Author manuscript; Available in PMC 2018 Apr 6. (PMC5889047; doi:10.4049/immunohorizons.1700024), 2017-08-15
Supplement: NIHMS953759-supplement-Supplemental_Table_1.pdf [file NIHMS953759-supplement-Supplemental_Table_1.pdf]

| Gene Symbol | Fold Difference rIL-33/PBS | Gene Symbol | Fold Difference rIL-33/PBS |
|-------------|----------------------------|-------------|----------------------------|
| Ccl24       | 284.9                      | Cmklr1      | 1.2                        |
| Ccl22       | 27.78                      | Cxcr1       | 1.19                       |
| Ccl7        | 21.97                      | Ccl6        | 1.17                       |
| Ccl11       | 20.46                      | Tgfb1       | 1.17                       |
| Ccl2        | 12.87                      | Ccl25       | 1.15                       |
| Ccl17       | 11.57                      | Ccr12       | 1.15                       |
| Ccl1        | 10.7                       | Mapk14      | 1.15                       |
| Cxcl13      | 7.24                       | Mapk1       | 1.12                       |
| Ccl12       | 6.88                       | Ccl9        | 1.1                        |
| Ackr1       | 6.05                       | Cxcl5       | 1.1                        |
| Ccl19       | 4.29                       | Ccl5        | 1.06                       |
| Cxcl10      | 4.2                        | Itgb2       | 1.04                       |
| Ccr5        | 3.29                       | Cxcr6       | 1.03                       |
| Ccl8        | 3.11                       | Cxcl12      | 1.02                       |
| Il4         | 2.92                       | Gusb        | 1                          |
| Ccl4        | 2.89                       | Hsp90ab1    | 1                          |
| Ccr8        | 2.62                       | Ccr11i      | 0.99                       |
| Ccr1        | 2.5                        | Cmtm2a      | 0.99                       |
| Cxcl9       | 2.34                       | Slit2       | 0.99                       |
| Itgam       | 2.34                       | Cx3cl1      | 0.97                       |
| Ccr3        | 2.32                       | Cxcr3       | 0.96                       |
| Ccr2        | 2.29                       | Cmtm4       | 0.95                       |
| Tnf         | 2.25                       | Ccl20       | 0.94                       |
| Cxcr2       | 1.99                       | Cxcl2       | 0.94                       |
| Ackr2       | 1.87                       | Cxcl15      | 0.92                       |
| Cxcl1       | 1.81                       | Cxcr4       | 0.92                       |
| Tymp        | 1.77                       | Cxcr5       | 0.89                       |
| Ccl3        | 1.72                       | Il16        | 0.88                       |
| Ccr4        | 1.71                       | Xcl1        | 0.85                       |
| Ifng        | 1.63                       | Ccr7        | 0.8                        |
| Cmtm6       | 1.51                       | Ccl26       | 0.78                       |
| Tlr2        | 1.5                        | Ackr3       | 0.78                       |
| Il6         | 1.48                       | Fpr1        | 0.78                       |
| Actb        | 1.48                       | Ppbp        | 0.77                       |
| Il1b        | 1.45                       | Gpr17       | 0.75                       |
| C5ar1       | 1.41                       | Ccr10       | 0.73                       |
| Cxcl16      | 1.4                        | Cmtm5       | 0.62                       |
| Ccr6        | 1.37                       | Ccr9        | 0.61                       |
| Tlr4        | 1.34                       | Ccl28       | 0.57                       |
| Cxcl14      | 1.33                       | Xcr1        | 0.56                       |
| Gapdh       | 1.32                       | Ackr4       | 0.51                       |
| Hif1a       | 1.27                       | Cx3cr1      | 0.48                       |
| Cmtm3       | 1.26                       | Cxcl3       | 0.34                       |
| Pf4         | 1.23                       | Cxcl11      | 0.28                       |
| B2m         | 1.22                       |             |                            |

**Supplemental Table 1:** IL-33 alters chemokine expression in the lungs. IL-33<sup>-/-</sup> mice received recombinant IL-33 (rIL-33) or PBS i.t. The mice were sacrificed six hours later and RNA was purified from total lung homogenate. cDNA was prepared and a qPCR array was used to assess transcript abundance of genes encoding chemokines and chemokine receptors, which were calculated using the delta-delta C<sub>T</sub> method.
